# Supplementary material
Source: MDPI journal article supplement (https://www.mdpi.com/2311-7524/7/12/591)
Supplement: s1 [file s1]

**Supplementary Material Table S1:** Blueberry fruit individual phenolics contents for the ‘Duke’ cultivar grown under the high tunnel and hail net conditions in the ridge and pots.

| Phenolics [mg (100 g) <sup>-1</sup> ] | Equivalents measure | High tunnel    |                 | Hail net       |                | Sign.               |
|---------------------------------------|---------------------|----------------|-----------------|----------------|----------------|---------------------|
|                                       | (where different)   | Ridge          | Pots            | Ridge          | Pots           | (across treatments) |
| Phenolic acids                        |                     |                |                 |                |                |                     |
| Ellagic acid derivative               |                     | 14.01 ± 0.94 b | 13.53 ± 1.14 bc | 12.48 ± 0.94 c | 19.31 ± 1.25 a | ***                 |
| Caffeic acid derivative 1             |                     | 0.13 ± 0.01 bc | 0.12 ± 0.03 c   | 0.15 ± 0.01 b  | 0.22 ± 0.01 a  | ***                 |
| Caffeic acid derivative 2             |                     | 0.59 ± 0.10 d  | 1.26 ± 0.09 c   | 2.55 ± 0.22 b  | 3.41 ± 0.29 a  | ***                 |
| 3-Caffeoylquinic acid                 |                     | 1.68 ± 0.10 d  | 2.67 ± 0.16 c   | 4.71 ± 0.08 b  | 5.65 ± 1.05 a  | ***                 |
| 4-Caffeoylquinic acid                 |                     | 2.51 ± 0.13 b  | 2.42 ± 0.09 b   | 1.89 ± 0.12 c  | 3.09 ± 0.20 a  | ***                 |
| 5-Caffeoylquinic acid                 |                     | 40.63 ± 2.45 b | 36.62 ± 2.38 c  | 25.28 ± 2.11 d | 55.86 ± 1.29 a | ***                 |
| Caffeoylquinic acid dimer             | Chlorogenic acid    | 0.64 ± 0.12 b  | 0.63 ± 0.17 b   | 1.19 ± 0.10 a  | 1.29 ± 0.29 a  | ***                 |
| Di-caffeoylquinic acid                | Chlorogenic acid    | 0.20 ± 0.02 bc | 0.17 ± 0.10 c   | 0.28 ± 0.02 b  | 0.39 ± 0.05 a  | ***                 |
| 5-Feruloylquinic acid                 | Ferulic acid        | 0.24 ± 0.02 ab | 0.24 ± 0.03 ab  | 0.23 ± 0.01 b  | 0.26 ± 0.02 a  | *                   |
| Ferulic acid derivative               |                     | 1.66 ± 0.14 d  | 2.02 ± 0.08 c   | 3.33 ± 0.20 b  | 3.55 ± 0.12 a  | ***                 |
| Feruloyl-glucoside                    | Ferulic acid        | 0.06 ± 0.02 c  | 0.05 ± 0.02 c   | 0.25 ± 0.02 a  | 0.23 ± 0.01 b  | ***                 |
| Total phenolic acids                  |                     | 62.35 ± 4.05 b | 59.62 ± 4.29 b  | 52.34 ± 3.83 c | 93.28 ± 4.58 a | ***                 |
| Sign. (tunnel vs net)                 |                     | NS             |                 |                |                |                     |
| Sign. (ridge vs pots)                 |                     | **             |                 |                |                |                     |
| Flavan-3-ols                          |                     |                |                 |                |                |                     |
| Procyanidin B1                        |                     | 10.55 ± 0.70 c | 14.51 ± 0.86 b  | 22.76 ± 1.11 a | 23.11 ± 1.15 a | ***                 |
| Procyanidin B2                        | Procyanidin B1      | 19.39 ± 1.28 c | 24.34 ± 2.02 b  | 25.10 ± 0.67 b | 53.93 ± 1.86 a | ***                 |
| Catechin                              |                     | 26.49 ± 1.29 b | 27.67 ± 1.19 b  | 27.05 ± 1.75 b | 30.77 ± 1.09 a | ***                 |
| Epicatechin                           |                     | 2.24 ± 0.38 b  | 2.27 ± 0.20 b   | 2.71 ± 0.31 b  | 3.51 ± 0.45 a  | ***                 |

|                                          |                                     |                 |                |                |                 |     |
|------------------------------------------|-------------------------------------|-----------------|----------------|----------------|-----------------|-----|
| <b>Total flavan-3-ols</b>                |                                     | 58.67 ± 3.65 d  | 68.79 ± 4.27 c | 77.61 ± 3.84 b | 111.32 ± 4.55 a | *** |
| Sign. (tunnel vs net)                    |                                     |                 |                | ***            |                 |     |
| Sign. (ridge vs pots)                    |                                     |                 |                | *              |                 |     |
| <b>Flavonols</b>                         |                                     |                 |                |                |                 |     |
| Myricetin-3- <i>O</i> -pentoside         | Myricetin-3- <i>O</i> -rhamnoside   | 0.12 ± 0.02 c   | 0.13 ± 0.03 c  | 0.56 ± 0.04 b  | 0.62 ± 0.05 a   | *** |
| Myricetin-3- <i>O</i> -hexoside          | Myricetin-3- <i>O</i> -rhamnoside   | 0.36 ± 0.02 c   | 0.57 ± 0.06 c  | 1.76 ± 0.36 b  | 2.98 ± 0.22 a   | *** |
| Laricitrin-3- <i>O</i> -glucoside        | Kaempferol-3- <i>O</i> -glucoside   | 0.98 ± 0.04 c   | 0.95 ± 0.19 c  | 6.84 ± 0.80 b  | 10.24 ± 0.39 a  | *** |
| Quercetin-3- <i>O</i> -rutinoside        |                                     | 0.08 ± 0.01 c   | 0.06 ± 0.01 c  | 0.18 ± 0.02 a  | 0.15 ± 0.02 b   | *** |
| Quercetin-3- <i>O</i> -galactoside       |                                     | 0.95 ± 0.03 c   | 1.18 ± 0.12 c  | 6.89 ± 0.34 b  | 10.01 ± 1.13 a  | *** |
| Quercetin-3- <i>O</i> -glucuronide       |                                     | 0.08 ± 0.01 c   | 0.10 ± 0.01 c  | 0.30 ± 0.02 b  | 0.35 ± 0.03 a   | *** |
| Quercetin-3- <i>O</i> -arabinopyranoside |                                     | 0.22 ± 0.02 c   | 0.17 ± 0.05 c  | 1.41 ± 0.10 b  | 2.12 ± 0.12 a   | *** |
| Quercetin-3- <i>O</i> -rhamnoside        |                                     | 0.07 ± 0.01 c   | 0.05 ± 0.02 c  | 0.37 ± 0.01 b  | 0.51 ± 0.03 a   | *** |
| Isorhamnetin-3- <i>O</i> -galactoside    | Isorhamnetin-3- <i>O</i> -glucoside | 1.26 ± 0.07 c   | 1.43 ± 0.08 bc | 1.51 ± 0.15 b  | 2.10 ± 0.26 a   | *** |
| Isorhamnetin-3- <i>O</i> -rutinoside     | Isorhamnetin-3- <i>O</i> -glucoside | 0.17 ± 0.02 b   | 0.17 ± 0.06 b  | 0.72 ± 0.10 a  | 0.79 ± 0.08 a   | *** |
| Syringetin-3- <i>O</i> -glucoside        | Myricetin-3- <i>O</i> -rhamnoside   | 0.64 ± 0.05 b   | 0.55 ± 0.22 b  | 2.32 ± 0.45 a  | 2.69 ± 0.26 a   | *** |
| <b>Total flavonols</b>                   |                                     | 4.90 ± 0.3 c    | 5.35 ± 0.85 c  | 22.87 ± 2.39 b | 31.91 ± 2.59 a  | *** |
| Sign. (tunnel vs net)                    |                                     |                 |                | ***            |                 |     |
| Sign. (ridge vs pots)                    |                                     |                 |                | NS             |                 |     |
| <b>Anthocyanins</b>                      |                                     |                 |                |                |                 |     |
| Delphinidin-3- <i>O</i> -galactoside     | Delphinidin-3- <i>O</i> -glucoside  | 3.79 ± 0.45     | 4.08 ± 1.26    | 4.21 ± 0.54    | 4.63 ± 0.27     | NS  |
| Delphinidin-3- <i>O</i> -glucoside       |                                     | 32.03 ± 2.62 d  | 50.86 ± 3.33 c | 107.7 ± 3.26 b | 136.7 ± 3.00 a  | *** |
| Delphinidin-3- <i>O</i> -arabinoside     | Delphinidin-3- <i>O</i> -glucoside  | 12.68 ± 1.08 d  | 22.76 ± 1.89 c | 39.27 ± 1.80 b | 64.05 ± 2.43 a  | *** |
| Cyanidin-3- <i>O</i> -galactoside        |                                     | 5.46 ± 0.62 d   | 7.12 ± 1.56 c  | 16.92 ± 1.05 b | 28.91 ± 1.44 a  | *** |
| Cyanidin-3- <i>O</i> -arabinoside        | Cyanidin-3- <i>O</i> -glucoside     | 0.61 ± 0.10 c   | 0.54 ± 0.23 c  | 1.84 ± 0.26 b  | 2.31 ± 0.24 a   | *** |
| Petunidin-3- <i>O</i> -galactoside       |                                     | 112.0 ± 10.14 d | 196.7 ± 9.24 c | 385.6 ± 11.0 b | 484.8 ± 9.47 a  | *** |
| Petunidin-3- <i>O</i> -arabinoside       |                                     | 16.14 ± 2.78 c  | 16.73 ± 0.33 c | 40.81 ± 0.94 b | 63.59 ± 1.62 a  | *** |

|                                     |                                 |                  |                  |                  |                   |     |
|-------------------------------------|---------------------------------|------------------|------------------|------------------|-------------------|-----|
| Peonidin-3- <i>O</i> -galactoside   | Peonidin-3- <i>O</i> -glucoside | 1.54 ± 0.26 c    | 1.66 ± 0.37 c    | 4.59 ± 0.93 b    | 6.08 ± 0.95 a     | *** |
| Peonidin-pentose                    | Peonidin-3- <i>O</i> -glucoside | 2.18 ± 0.54 b    | 2.86 ± 1.01 b    | 7.75 ± 1.87 a    | 9.02 ± 1.61 a     | *** |
| Malvidin-3- <i>O</i> -hexoside      | Malvidin-3- <i>O</i> -glucoside | 39.36 ± 3.09 d   | 64.48 ± 2.04 c   | 132.6 ± 4.73 b   | 156.7 ± 9.37 a    | *** |
| Malvidin-3- <i>O</i> -arabinoside   | Malvidin-3- <i>O</i> -glucoside | 3.37 ± 0.64 c    | 4.90 ± 0.47 b    | 9.83 ± 1.01 a    | 11.20 ± 1.87 a    | *** |
| Malvidin-3- <i>O</i> -xyloside      | Malvidin-3- <i>O</i> -glucoside | 15.95 ± 2.97 d   | 24.38 ± 3.65 c   | 40.82 ± 5.40 b   | 65.98 ± 6.40 a    | *** |
| Malvidin-3-(6''-acetyl) galactoside | Malvidin-3- <i>O</i> -glucoside | 2.23 ± 0.24 b    | 4.09 ± 0.96 a    | 3.61 ± 0.92 a    | 4.14 ± 0.71 a     | **  |
| Malvidin-3-(6''-acetyl) glucoside   | Malvidin-3- <i>O</i> -glucoside | 1.72 ± 0.30 c    | 2.29 ± 0.66 bc   | 2.78 ± 0.50 ab   | 3.26 ± 0.36 a     | *** |
| <b>Total anthocyanins</b>           |                                 | 249.07 ± 25.83 d | 403.45 ± 27.00 c | 798.13 ± 34.21 b | 1041.34 ± 39.74 a | *** |
| Sign. (tunnel vs net)               |                                 |                  |                  | ***              |                   |     |
| Sign. (ridge vs pots)               |                                 |                  |                  | NS               |                   |     |

Data are means ± standard errors of 5 replicates

Sign. (tunnel vs net), significance between protected environments (Duncan tests;  $\alpha < 0.05$ )

Sign. (ridge vs pots), significance between planting systems (Duncan tests;  $\alpha < 0.05$ )

Data with different lowercase letters within rows are significantly differences (Duncan tests;  $\alpha < 0.05$ )

NS, not significant; \*,  $p < 0.05$ ; \*\*,  $p < 0.01$ ; \*\*\*,  $p < 0.001$

**Supplementary Material Table S2.** Blueberry fruit individual phenolics contents for the ‘Aurora’ cultivar grown under the high tunnel and hail net conditions in the ridge and pots.

| Phenolics [mg (100 g) <sup>-1</sup> ] | Equivalents measure | High tunnel    |                  | Hail net         |                 | Sign.               |
|---------------------------------------|---------------------|----------------|------------------|------------------|-----------------|---------------------|
|                                       | (where different)   | Ridge          | Pots             | Ridge            | Pots            | (across treatments) |
| Phenolic acids                        |                     |                |                  |                  |                 |                     |
| Ellagic acid derivative               |                     | 55.78 ± 1.38 b | 40.06 ± 1.20 d   | 45.75 ± 1.83 c   | 64.90 ± 1.69 a  | ***                 |
| Caffeic acid derivative 1             |                     | 0.57 ± 0.07 bc | 0.46 ± 0.07 c    | 0.60 ± 0.11 b    | 0.74 ± 0.11 a   | **                  |
| Caffeic acid derivative 2             |                     | 9.56 ± 0.83 a  | 9.07 ± 0.72 ab   | 9.23 ± 0.70 ab   | 8.29 ± 0.60 b   | *                   |
| 4-Caffeoylquinic acid                 |                     | 4.22 ± 0.31 a  | 4.20 ± 0.47 a    | 3.72 ± 0.42 ab   | 3.52 ± 0.55 b   | *                   |
| 5-Caffeoylquinic acid                 |                     | 142.9 ± 2.89 a | 117.1 ± 8.86 b   | 104.0 ± 6.42 c   | 87.74 ± 5.59 d  | ***                 |
| Caffeoylquinic acid dimer             | Chlorogenic acid    | 1.59 ± 0.24 b  | 2.70 ± 0.23 a    | 1.35 ± 0.10 bc   | 1.14 ± 0.12 c   | ***                 |
| 5-Feruloylquinic acid                 | Ferulic acid        | 0.26 ± 0.03 b  | 0.33 ± 0.05 a    | 0.23 ± 0.04 bc   | 0.20 ± 0.01 c   | ***                 |
| Ferulic acid derivative               |                     | 5.16 ± 0.55 ab | 5.87 ± 0.52 a    | 5.32 ± 0.43 ab   | 5.05 ± 0.63 b   | *                   |
| Total phenolic acids                  |                     | 220.03 ± 6.3 a | 179.81 ± 12.12 b | 170.23 ± 10.05 c | 171.59 ± 9.3 c  | **                  |
| Sign. (tunnel vs net)                 |                     | ***            |                  |                  |                 |                     |
| Sign. (ridge vs pots)                 |                     | *              |                  |                  |                 |                     |
| Flavan-3-ols                          |                     |                |                  |                  |                 |                     |
| Procyanidin B1                        |                     | 50.84 ± 1.95 a | 49.76 ± 1.05 ab  | 47.77 ± 1.90 b   | 43.41 ± 2.26 c  | ***                 |
| Procyanidin B2                        | Procyanidin B1      | 29.06 ± 1.57 b | 34.38 ± 1.09 a   | 29.20 ± 3.38 b   | 28.43 ± 2.47 b  | **                  |
| Catechin                              |                     | 42.57 ± 1.49 b | 45.58 ± 1.48 a   | 36.23 ± 1.63 c   | 33.73 ± 1.20 d  | ***                 |
| Epicatechin                           |                     | 2.98 ± 0.39    | 2.80 ± 0.22      | 2.86 ± 0.35      | 2.76 ± 0.36     | NS                  |
| Total flavan-3-ols                    |                     | 125.45 ± 5.4 b | 132.51 ± 3.84 a  | 116.07 ± 7.26 c  | 108.33 ± 6.29 d | ***                 |
| Sign. (tunnel vs net)                 |                     | ***            |                  |                  |                 |                     |

| Sign. (ridge vs pots)                    |                                     |                 | NS             |                |                 |     |
|------------------------------------------|-------------------------------------|-----------------|----------------|----------------|-----------------|-----|
| Flavonols                                |                                     |                 |                |                |                 |     |
| Myricetin-3- <i>O</i> -pentoside         | Myricetin-3- <i>O</i> -rhamnoside   | 0.60 ± 0.02 b   | 0.55 ± 0.06 b  | 0.80 ± 0.08 a  | 0.75 ± 0.05 a   | *** |
| Myricetin-3- <i>O</i> -hexoside          | Myricetin-3- <i>O</i> -rhamnoside   | 1.03 ± 0.09 b   | 0.72 ± 0.07 b  | 1.47 ± 0.31 a  | 1.68 ± 0.34 a   | *** |
| Myricetin-rhamno-hexoside                | Myricetin-3- <i>O</i> -rhamnoside   | 1.00 ± 0.03 b   | 0.60 ± 0.08 c  | 1.23 ± 0.21 a  | 1.27 ± 0.11 a   | *** |
| Laricitrin-3- <i>O</i> -glucoside        | Kaempferol-3- <i>O</i> -glucoside   | 0.24 ± 0.03 b   | 0.21 ± 0.02 b  | 1.03 ± 0.10 a  | 1.01 ± 0.04 a   | *** |
| Quercetin-3- <i>O</i> -rutinoside        |                                     | 2.10 ± 0.17 c   | 2.28 ± 0.27 bc | 3.29 ± 0.71 a  | 2.83 ± 0.18 ab  | *** |
| Quercetin-3- <i>O</i> -galactoside       |                                     | 1.68 ± 0.07 b   | 1.47 ± 0.09 b  | 7.15 ± 0.62 a  | 6.99 ± 0.64 a   | *** |
| Quercetin-3- <i>O</i> -glucoside         |                                     | 1.54 ± 0.17 b   | 1.40 ± 0.17 b  | 4.19 ± 0.54 a  | 3.77 ± 0.67 a   | *** |
| Quercetin-3- <i>O</i> -glucuronide       |                                     | 2.77 ± 0.26 b   | 2.46 ± 0.29 b  | 5.98 ± 0.73 a  | 5.46 ± 0.61 a   | *** |
| Quercetin-3- <i>O</i> -arabinopyranoside |                                     | 0.44 ± 0.07 b   | 0.47 ± 0.04 b  | 1.68 ± 0.17 a  | 1.61 ± 0.09 a   | *** |
| Quercetin-3- <i>O</i> -arabinofuranoside |                                     | 0.64 ± 0.09 c   | 0.62 ± 0.04 c  | 1.49 ± 0.08 a  | 1.34 ± 0.10 b   | *** |
| Kaempferol-3- <i>O</i> -rutinoside       | Kaempferol-3- <i>O</i> -glucoside   | 0.46 ± 0.03 c   | 0.57 ± 0.04 b  | 0.67 ± 0.05 a  | 0.59 ± 0.03 b   | *** |
| Isorhamnetin-3- <i>O</i> -galactoside    | Isorhamnetin-3- <i>O</i> -glucoside | 0.14 ± 0.02 bc  | 0.10 ± 0.01 c  | 0.17 ± 0.03 ab | 0.20 ± 0.04 a   | *** |
| Isorhamnetin-3- <i>O</i> -rutinoside     | Isorhamnetin-3- <i>O</i> -glucoside | 1.29 ± 0.05 c   | 1.32 ± 0.01 c  | 1.63 ± 0.11 a  | 1.43 ± 0.04 b   | *** |
| Syringetin-3- <i>O</i> -glucoside        | Myricetin-3- <i>O</i> -rhamnoside   | 0.29 ± 0.04 c   | 0.28 ± 0.03 c  | 0.68 ± 0.09 a  | 0.61 ± 0.04 b   | *** |
| Total flavonols                          |                                     | 14.20 ± 1.14 b  | 13.06 ± 1.22 b | 31.47 ± 3.83 a | 29.54 ± 2.98 a  | **  |
| Sign. (tunnel vs net)                    |                                     |                 | ***            |                |                 |     |
| Sign. (ridge vs pots)                    |                                     |                 | NS             |                |                 |     |
| Anthocyanins                             |                                     |                 |                |                |                 |     |
| Delphinidin-3- <i>O</i> -galactoside     | Delphinidin-3- <i>O</i> -glucoside  | 2.68 ± 0.34 c   | 3.05 ± 0.69 bc | 3.64 ± 0.35 b  | 4.46 ± 0.58 a   | *** |
| Delphinidin-3- <i>O</i> -glucoside       |                                     | 116.3 ± 3.46 b  | 79.09 ± 2.47 c | 117.0 ± 8.99 b | 134.8 ± 10.88 a | *** |
| Delphinidin-3- <i>O</i> -arabinoside     | Delphinidin-3- <i>O</i> -glucoside  | 30.60 ± 1.73 b  | 23.41 ± 1.37 c | 30.53 ± 1.77 b | 35.14 ± 1.57 a  | *** |
| Cyanidin-3- <i>O</i> -galactoside        |                                     | 21.42 ± 1.13 b  | 16.39 ± 0.96 c | 20.98 ± 0.66 b | 24.00 ± 0.98 a  | *** |
| Cyanidin-3- <i>O</i> -arabinoside        | Cyanidin-3- <i>O</i> -glucoside     | 1.71 ± 0.35 ab  | 1.48 ± 0.19 b  | 1.87 ± 0.23 a  | 1.95 ± 0.23 a   | *   |
| Petunidin-3- <i>O</i> -galactoside       |                                     | 304.1 ± 10.02 c | 252.6 ± 5.22 d | 316.4 ± 9.25 b | 357.3 ± 7.71 a  | *** |

|                                    |                                 |                  |                  |                  |                  |     |
|------------------------------------|---------------------------------|------------------|------------------|------------------|------------------|-----|
| Petunidin-3- <i>O</i> -arabinoside |                                 | 46.63 ± 2.29 b   | 41.14 ± 2.43 c   | 45.59 ± 2.36 b   | 59.54 ± 2.48 a   | *** |
| Peonidin-3- <i>O</i> -galactoside  | Peonidin-3- <i>O</i> -glucoside | 3.37 ± 0.24 b    | 2.97 ± 0.18 c    | 3.30 ± 0.38 bc   | 4.30 ± 0.24 a    | *** |
| Peonidin-pentose                   | Peonidin-3- <i>O</i> -glucoside | 8.02 ± 0.59 a    | 6.61 ± 0.47 b    | 7.36 ± 0.76 ab   | 7.82 ± 0.66 a    | *   |
| Malvidin-3- <i>O</i> -hexoside     | Malvidin-3- <i>O</i> -glucoside | 112.7 ± 3.72 ab  | 109.6 ± 7.59 b   | 122.4 ± 11.10 a  | 115.2 ± 8.32 ab  | *   |
| Malvidin-3- <i>O</i> -arabinoside  | Malvidin-3- <i>O</i> -glucoside | 8.51 ± 0.67      | 8.30 ± 1.06      | 8.32 ± 1.24      | 8.76 ± 0.58      | NS  |
| Malvidin-3- <i>O</i> -xyloside     | Malvidin-3- <i>O</i> -glucoside | 44.08 ± 2.67     | 45.12 ± 4.01     | 45.59 ± 5.69     | 43.86 ± 3.55     | NS  |
| <b>Total anthocyanins</b>          |                                 | 700.07 ± 27.21 b | 589.82 ± 26.64 c | 723.43 ± 42.78 b | 797.31 ± 37.78 a | *** |
| Sign. (tunnel vs net)              |                                 |                  |                  | ***              |                  |     |
| Sign. (ridge vs pots)              |                                 |                  | NS               |                  |                  |     |

Data are means ± standard errors of 5 replicates

Sign. (tunnel vs net), significance between protected environments (Duncan tests;  $\alpha < 0.05$ )

Sign. (ridge vs pots), significance between planting systems (Duncan tests;  $\alpha < 0.05$ )

Data with different lowercase letters within rows are significantly different (Duncan tests;  $\alpha < 0.05$ )

NS, not significant; \*,  $p < 0.05$ ; \*\*,  $p < 0.01$ ; \*\*\*,  $p < 0.001$

**Supplementary Material Table S3.** Blueberry fruit individual phenolics contents for the ‘Brigitta’ cultivar grown under the high tunnel and hail net conditions in the ridge and pots.

| Phenolics [mg (100 g) <sup>-1</sup> ] | Equivalents measure                                                                  | High tunnel     |                 | Hail net        |                 | Sign.               |
|---------------------------------------|--------------------------------------------------------------------------------------|-----------------|-----------------|-----------------|-----------------|---------------------|
|                                       | (where different)                                                                    | Ridge           | Pots            | Ridge           | Pots            | (across treatments) |
| Phenolic acids                        |                                                                                      |                 |                 |                 |                 |                     |
| Ellagic acid derivative               | Chlorogenic acid<br><br>Ferulic acid<br><br><br><br>Ferulic acid<br><br>Ferulic acid | 30.15 ± 1.14 c  | 31.31 ± 1.43 c  | 37.60 ± 0.65 b  | 47.11 ± 0.90 a  | ***                 |
| Caffeic acid derivative 1             |                                                                                      | 0.15 ± 0.01 c   | 0.15 ± 0.01 c   | 0.21 ± 0.02 b   | 0.24 ± 0.01 a   | ***                 |
| Caffeic acid derivative 2             |                                                                                      | 3.16 ± 0.26 b   | 3.10 ± 0.06 b   | 3.32 ± 0.05 b   | 6.63 ± 0.31 a   | ***                 |
| Caffeic acid derivative 3             |                                                                                      | 0.54 ± 0.11 ab  | 0.54 ± 0.12 a   | 0.38 ± 0.05 c   | 0.39 ± 0.11 bc  | *                   |
| 4-Caffeoylquinic acid                 |                                                                                      | 2.91 ± 0.30 a   | 2.91 ± 0.51 a   | 2.39 ± 0.36 b   | 2.23 ± 0.29 b   | *                   |
| 5-Caffeoylquinic acid                 |                                                                                      | 95.37 ± 4.71 b  | 106.0 ± 4.89 a  | 64.46 ± 2.69 c  | 61.25 ± 3.86 c  | ***                 |
| Caffeoylquinic acid dimer             |                                                                                      | 1.37 ± 0.06 b   | 1.61 ± 0.12 a   | 1.20 ± 0.27 b   | 1.20 ± 0.13 b   | **                  |
| 5-Feruloylquinic acid                 |                                                                                      | 0.21 ± 0.02 a   | 0.21 ± 0.04 a   | 0.15 ± 0.03 b   | 0.19 ± 0.03 ab  | *                   |
| Ferulic acid derivative               |                                                                                      | 4.05 ± 0.90     | 3.80 ± 0.45     | 4.04 ± 0.83     | 4.73 ± 0.79     | NS                  |
| Feruloyl-glucoside                    |                                                                                      | 0.08 ± 0.01 b   | 0.09 ± 0.02 b   | 0.08 ± 0.01 b   | 0.12 ± 0.03     | *                   |
| Total phenolic acids                  |                                                                                      | 137.99 ± 7.52 b | 149.71 ± 7.65 a | 113.84 ± 4.96 d | 124.08 ± 6.46 c | **                  |
| Sign. (tunnel vs net)                 |                                                                                      | ***             |                 |                 |                 |                     |
| Sign. (ridge vs pots)                 |                                                                                      | *               |                 |                 |                 |                     |
| Flavan-3-ols                          |                                                                                      |                 |                 |                 |                 |                     |
| Procyanidin B1                        | Procyanidin B1                                                                       | 43.83 ± 0.99 c  | 52.75 ± 1.68 b  | 45.30 ± 3.15 c  | 58.84 ± 1.75 a  | ***                 |
| Procyanidin B2                        |                                                                                      | 10.51 ± 1.35 bc | 9.71 ± 1.14 c   | 13.81 ± 2.81 b  | 19.60 ± 4.33 a  | ***                 |
| Catechin                              |                                                                                      | 34.15 ± 1.31 c  | 35.78 ± 1.05 b  | 33.93 ± 1.45 c  | 40.55 ± 0.64 a  | ***                 |
| Epicatechin                           |                                                                                      | 2.17 ± 0.27 a   | 2.37 ± 0.22 a   | 1.49 ± 0.25 b   | 1.42 ± 0.33 b   | ***                 |
| Total flavan-3-ols                    |                                                                                      | 90.66 ± 3.92 c  | 100.61 ± 4.09 b | 94.53 ± 7.66 bc | 120.42 ± 7.05 a | ***                 |

Sign. (tunnel vs net)

\*

Sign. (ridge vs pots)

\*\*\*

**Flavonols**

|                                          |                                     |               |                |                |                |     |
|------------------------------------------|-------------------------------------|---------------|----------------|----------------|----------------|-----|
| Myricetin-3- <i>O</i> -pentoside         | Myricetin-3- <i>O</i> -rhamnoside   | 0.38 ± 0.03 c | 0.40 ± 0.08 bc | 0.45 ± 0.01 ab | 0.48 ± 0.04 a  | *   |
| Myricetin-3- <i>O</i> -hexoside          | Myricetin-3- <i>O</i> -rhamnoside   | 0.65 ± 0.15 c | 0.67 ± 0.18 c  | 1.49 ± 0.35 b  | 1.93 ± 0.14 a  | *** |
| Myricetin-rhamno-hexoside                | Myricetin-3- <i>O</i> -rhamnoside   | 0.14 ± 0.01 b | 0.18 ± 0.02 a  | 0.10 ± 0.02 c  | 0.17 ± 0.02 a  | *** |
| Laricitrin-3- <i>O</i> -glucoside        | Kaempferol-3- <i>O</i> -glucoside   | 0.37 ± 0.02 b | 0.40 ± 0.05 b  | 0.65 ± 0.05 a  | 0.65 ± 0.06 a  | *** |
| Quercetin-3- <i>O</i> -rutinoside        |                                     | 1.69 ± 0.12 b | 1.62 ± 0.20 b  | 2.09 ± 0.12 a  | 2.02 ± 0.13 a  | *** |
| Quercetin-3- <i>O</i> -galactoside       |                                     | 1.98 ± 0.19 b | 2.63 ± 0.26 b  | 5.65 ± 0.25 a  | 5.50 ± 0.89 a  | *** |
| Quercetin-3- <i>O</i> -glucoside         |                                     | 1.32 ± 0.12 b | 1.22 ± 0.18 b  | 2.83 ± 0.50 a  | 2.68 ± 0.21 a  | *** |
| Quercetin-3- <i>O</i> -glucuronide       |                                     | 0.14 ± 0.01 b | 0.16 ± 0.01 a  | 0.17 ± 0.01 a  | 0.17 ± 0.02 a  | **  |
| Quercetin-3- <i>O</i> -arabinopyranoside |                                     | 0.27 ± 0.01 b | 0.34 ± 0.06 b  | 0.65 ± 0.08 a  | 0.62 ± 0.09 a  | *** |
| Quercetin-3- <i>O</i> -rhamnoside        |                                     | 0.69 ± 0.03 b | 0.76 ± 0.11 b  | 1.11 ± 0.04 a  | 1.09 ± 0.12 a  | *** |
| Kaempferol-3- <i>O</i> -rutinoside       | Kaempferol-3- <i>O</i> -glucoside   | 0.34 ± 0.03 b | 0.37 ± 0.05 ab | 0.37 ± 0.04 ab | 0.40 ± 0.01 a  | .   |
| Isorhamnetin-3- <i>O</i> -galactoside    | Isorhamnetin-3- <i>O</i> -glucoside | 0.59 ± 0.02 c | 0.52 ± 0.02 d  | 0.66 ± 0.06 b  | 0.93 ± 0.03 a  | *** |
| Isorhamnetin-3- <i>O</i> -rutinoside     | Isorhamnetin-3- <i>O</i> -glucoside | 0.16 ± 0.00 b | 0.20 ± 0.02 a  | 0.15 ± 0.01 b  | 0.19 ± 0.01 a  | *** |
| Syringetin-3- <i>O</i> -glucoside        | Myricetin-3- <i>O</i> -rhamnoside   | 0.68 ± 0.04 b | 0.69 ± 0.05 b  | 0.60 ± 0.11 b  | 0.98 ± 0.11 a  | *** |
| <b>Total flavonols</b>                   |                                     | 9.40 ± 0.78 b | 10.17 ± 1.29 b | 16.99 ± 1.65 a | 17.81 ± 1.97 a | **  |

Sign. (tunnel vs net)

\*\*\*

Sign. (ridge vs pots)

NS

**Anthocyanins**

|                                      |                                    |                |                |                |                |     |
|--------------------------------------|------------------------------------|----------------|----------------|----------------|----------------|-----|
| Delphinidin-3- <i>O</i> -galactoside | Delphinidin-3- <i>O</i> -glucoside | 3.99 ± 0.23 b  | 3.95 ± 0.29 b  | 3.67 ± 0.46 b  | 5.45 ± 0.24 a  | *** |
| Delphinidin-3- <i>O</i> -glucoside   |                                    | 72.05 ± 2.70 c | 72.33 ± 2.33 c | 83.57 ± 3.66 b | 113.2 ± 5.00 a | *** |
| Delphinidin-3- <i>O</i> -arabinoside | Delphinidin-3- <i>O</i> -glucoside | 32.40 ± 2.41 b | 27.22 ± 1.35 c | 27.07 ± 1.75 c | 36.80 ± 1.83 a | *** |
| Cyanidin-3- <i>O</i> -galactoside    |                                    | 14.71 ± 0.84 b | 14.82 ± 0.73 b | 15.69 ± 1.39 b | 20.03 ± 1.65 a | *** |
| Cyanidin-3- <i>O</i> -arabinoside    | Cyanidin-3- <i>O</i> -glucoside    | 1.23 ± 0.22    | 1.25 ± 0.27    | 1.24 ± 0.20    | 1.48 ± 0.15    | NS  |



|                                    |                                 |                  |                  |                  |                  |     |
|------------------------------------|---------------------------------|------------------|------------------|------------------|------------------|-----|
| Petunidin-3- <i>O</i> -galactoside |                                 | 210.9 ± 11.87 c  | 201.1 ± 7.73 c   | 248.5 ± 13.81 b  | 316.1 ± 12.78 a  | *** |
| Petunidin-3- <i>O</i> -arabinoside |                                 | 45.44 ± 2.34 a   | 47.36 ± 1.53 a   | 34.46 ± 2.42 b   | 44.39 ± 2.17 a   | *** |
| Peonidin-3- <i>O</i> -galactoside  | Peonidin-3- <i>O</i> -glucoside | 3.59 ± 0.81 b    | 3.64 ± 0.36 b    | 2.65 ± 0.39 c    | 4.47 ± 0.59 a    | **  |
| Peonidin-pentose                   | Peonidin-3- <i>O</i> -glucoside | 5.58 ± 0.66 a    | 5.47 ± 0.37 a    | 4.62 ± 0.86 b    | 5.56 ± 0.24 a    | .   |
| Malvidin-3- <i>O</i> -hexoside     | Malvidin-3- <i>O</i> -glucoside | 71.13 ± 5.60 a   | 63.97 ± 2.92 b   | 72.59 ± 1.99 a   | 70.60 ± 2.87 a   | **  |
| Malvidin-3- <i>O</i> -arabinoside  | Malvidin-3- <i>O</i> -glucoside | 6.35 ± 0.44      | 6.11 ± 0.70      | 6.45 ± 0.68      | 6.16 ± 0.83      | NS  |
| Malvidin-3- <i>O</i> -xyloside     | Malvidin-3- <i>O</i> -glucoside | 29.48 ± 1.56     | 30.74 ± 2.81     | 33.28 ± 2.02     | 35.31 ± 2.32     | NS  |
| <b>Total anthocyanins</b>          |                                 | 496.82 ± 29.68 c | 477.92 ± 21.39 c | 533.79 ± 29.63 b | 659.62 ± 30.67 a | *** |
| Sign. (tunnel vs net)              |                                 |                  |                  | ***              |                  |     |
| Sign. (ridge vs pots)              |                                 |                  |                  | NS               |                  |     |

Data are means ±standard errors of 5 replicates

Sign. (tunnel vs net), significance between protected environments (Duncan tests;  $\alpha < 0.05$ )

Sign. (ridge vs pots), significance between planting systems (Duncan tests;  $\alpha < 0.05$ )

Data with different lowercase letters within rows are significantly differences (Duncan tests;  $\alpha < 0.05$ )

NS, not significant; \*,  $p < 0.05$ ; \*\*,  $p < 0.01$ ; \*\*\*,  $p < 0.001$
